# Supplementary material for: RP-18 HPLC Analysis of Drugs’ Ability to Cross the Blood-Brain Barrier
Source: Hindawi journal article supplement (doi:10.1155/2019/5795402), 2019-03-27
Supplement: f3 [file 5795402.f3.docx]

Table 2. Statistics for Equations (1) – (6)

| Equation | R | R2 | F | p | s | n | *Q2LOO* | *SDEP* | *PRESS* | *SPRESS* | *Q2LMO* |
| --- | --- | --- | --- | --- | --- | --- | --- | --- | --- | --- | --- |
| (1) | 0.79 | 0.62 | F(5,34) = 10.955 | <.00000 | 0.52755 | 40 |  |  |  |  |  |
| (2) | 0.98 | 0.96 | F(3,36) = 274.39 | <0.0000 | 0.11644 | 40 | 0.95 | 0.015318 | 0.612734 | 0.123767 | 0.94 |
| (3) | 0.94 | 0.89 | F(3,106) = 285.61 | <0.0000 | 0.22689 | 110 | 0.87 | 0.055635 | 6.119837 | 0.235870 | 0.87 |
| (4) | 0.83 | 0.68 | F(6,33) = 11.864 | <.00000 | 0.48697 | 40 | 0.55 | 0.280804 | 11.232164 | 0.529910 | 0.50 |
| (5) | 0.98 | 0.96 | F(4,35) = 215.32 | <0.0000 | 0.11401 | 40 | 0.95 | 0.015331 | 0.613251 | 0.123820 | 0.94 |
| (6) | 0.95 | 0.89 | F(4,105) = 294.70 | <0.0000 | 0.22374 | 110 | 0.88 | 0.054001 | 5.940132 | 0.232382 | 0.88 |
